# Supplementary material for: Kaolinite–ionic liquid nanohybrid materials as electrochemical sensors for size-selective detection of anions
Source: Royal Society of Chemistry journal article supplement (doi:10.1039/c2jm34772e), 2012-01-01
Supplement: c2jm34772e.pdf [file c2jm34772e.pdf]

## Supplementary Information

### Kaolinite - ionic liquids nanohybrid materials as electrochemical sensors for size-selective detection of anions

Gustave Kenne Dedzo, Sadok Letaief and Christian Detellier\*

*Department of Chemistry and Center for Catalysis Research and Innovation, University of Ottawa, 10, Marie-Curie, Ottawa (Ont) K1N6N5 Canada. Email : dete@uottawa.ca*

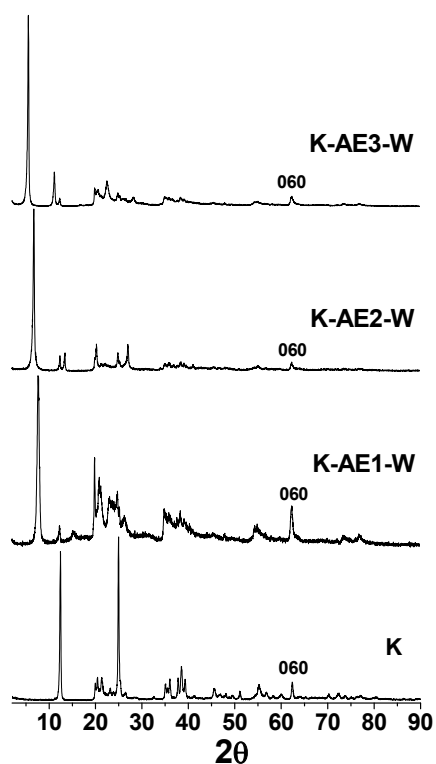

**Fig. S1** XRD patterns of powdered pure or modified kaolinite for  $2\theta$  values between 2 and  $90^\circ$ .

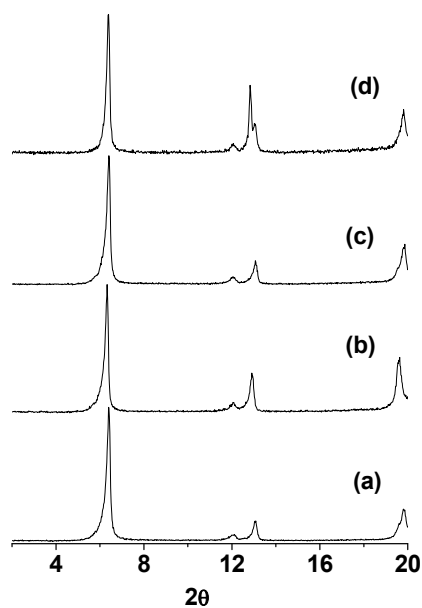

**Fig. S2** XRD patterns recorded for  $2\theta$  values between 2 and  $20^\circ$  on oriented slides of K-AE2-W (a) and suspended for two hours in aqueous solutions of NaSCN 1M (b),  $\text{Na}_2\text{SO}_3$  1 M (c) and saturated  $\text{K}_3\text{Fe}(\text{CN})_6$  (d)

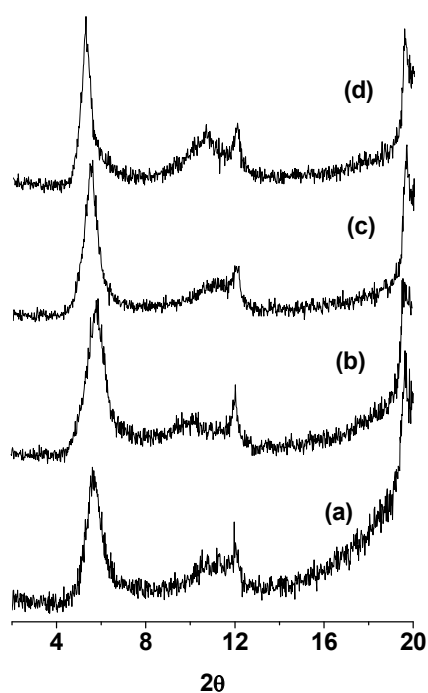

**Fig. S3** XRD patterns recorded for  $2\theta$  values between 2 and  $20^\circ$  on oriented slides of K-AE2-W (a) and suspended for 24 hours in aqueous solutions of NaSCN 1M (b),  $\text{Na}_2\text{SO}_3$  1 M (c) and saturated  $\text{K}_3\text{Fe}(\text{CN})_6$  (d)
